# Supplementary material for: Carotid Intima-Media Thickness and Long-Term Exposure to Traffic-Related Air Pollution in Middle-Aged Residents of Taiwan: A Cross-Sectional Study
Source: PubMed Central journal article supplement (PMC4529007; doi:10.1289/ehp.1408553), 2015-03-20
Supplement: ehp.1408553.s001.acco.pdf [file ehp.1408553.s001.acco.pdf]

**Note to Readers:** *EHP* strives to ensure that all journal content is accessible to all readers. However, some figures and Supplemental Material published in *EHP* articles may not conform to 508 standards due to the complexity of the information being presented. If you need assistance accessing journal content, please contact [ehp508@niehs.nih.gov](mailto:ehp508@niehs.nih.gov). Our staff will work with you to assess and meet your accessibility needs within 3 working days.

## **Supplemental Material**

# **Carotid Intima–Media Thickness and Long-Term Exposure to Traffic-Related Air Pollution in Middle-Aged Residents of Taiwan: A Cross-Sectional Study**

Ta-Chen Su, Juey-Jen Hwang, Yu-Cheng Shen, and Chang-Chuan Chan

### **Table of Contents**

**Table S1.** Pearson's correlation between 5 different pollutants (N=689).

**Table S2.** Models for two pollutants (PM<sub>2.5</sub> abs and NO<sub>2</sub>) as determinants of carotid intima-media thickness (CIMT) after adjusting other cardiovascular covariates.

**Table S3.** Interaction effects and the subgroups analysis to maximum CIMT at LCCA with PM<sub>2.5</sub> abs.

**Table S4.** Interaction effects and the subgroups analysis to maximum CIMT at LCCA with NO<sub>2</sub>.

**Table S1.** Pearson's correlation between 5 different pollutants (N=689).

| <b>Exposure</b>       | <b>Estimate</b> | <b>PM<sub>2.5</sub></b> | <b>PM<sub>2.5abs</sub></b> | <b>PM<sub>10</sub></b> | <b>NO<sub>2</sub></b> | <b>NO<sub>x</sub></b> |
|-----------------------|-----------------|-------------------------|----------------------------|------------------------|-----------------------|-----------------------|
| PM <sub>2.5</sub>     | r               | 1.00                    | 0.57                       | 0.56                   | 0.38                  | 0.44                  |
|                       | P               |                         | <.001                      | <.001                  | <.001                 | <.001                 |
| PM <sub>2.5 abs</sub> | r               | 0.57                    | 1.00                       | 0.56                   | 0.55                  | 0.56                  |
|                       | P               | <.001                   |                            | <.001                  | <.001                 | <.001                 |
| PM <sub>10</sub>      | r               | 0.56                    | 0.56                       | 1.00                   | 0.46                  | 0.44                  |
|                       | P               | <.001                   | <.001                      |                        | <.001                 | <.001                 |
| NO <sub>2</sub>       | r               | 0.38                    | 0.55                       | 0.46                   | 1.00                  | 0.91                  |
|                       | P               | <.001                   | <.001                      | <.001                  |                       | <.001                 |
| NO <sub>x</sub>       | r               | 0.44                    | 0.56                       | 0.44                   | 0.91                  | 1.00                  |
|                       | P               | <.001                   | <.001                      | <.0001                 | <.001                 |                       |

**Table S2.** Models for two pollutants (PM<sub>2.5</sub> abs and NO<sub>2</sub>) as determinants of carotid intima-media thickness (CIMT) after adjusting other cardiovascular covariates.

| <b>Outcome</b>        | <b>PM<sub>2.5</sub>abs (10<sup>-5</sup> m<sup>-1</sup>)<br/>% difference (95% CI)</b> | <b>NO<sub>2</sub> (20 µg/m<sup>3</sup>)<br/>% difference (95% CI)</b> |
|-----------------------|---------------------------------------------------------------------------------------|-----------------------------------------------------------------------|
| Mean CIMT at LCCA     | 3.58 (-1.02, 8.18)                                                                    | 0.35 (-1.12, 1.82)                                                    |
| Mean CIMT at RCCA     | -0.10 (-4.64, 4.43)                                                                   | 0.83 (-0.62, 2.28)                                                    |
| Combined mean CIMT    | 1.75 (-2.21, 5.72)                                                                    | 0.59 (-0.68, 1.86)                                                    |
| Maximum CIMT at LCCA  | 2.57 (-2.14, 7.28)                                                                    | 0.95 (-0.56, 2.45)                                                    |
| Maximum CIMT at RCCA  | 0.09 (-4.26, 4.44)                                                                    | 0.88 (-0.52, 2.27)                                                    |
| Combined maximum CIMT | 1.35 (-2.50, 5.20)                                                                    | 0.91 (-0.32, 2.14)                                                    |

Adjusted for age, male gender, body mass index, systolic blood pressure, LDL-cholesterol, lipid-lowering treatment, diabetes mellitus, education, and ever smoking history.

**Table S3.** Interaction effects and the subgroups analysis to maximum CIMT at LCCA with PM<sub>2.5</sub> abs.

| Interaction Effect <sup>a</sup>                |                       | Subgroups Analysis <sup>b</sup> |     |                       |
|------------------------------------------------|-----------------------|---------------------------------|-----|-----------------------|
| Interaction Term                               | % difference (95% CI) | Subgroup                        | N   | % difference (95% CI) |
| PM <sub>2.5</sub> abs*Age                      | 0.16 (-0.35, 0.68)    | Age<50 years                    | 371 | 1.18 (-1.01, 3.38)    |
|                                                |                       | Age≥50 years                    | 318 | 1.88 (-2.21, 5.97)    |
| PM <sub>2.5</sub> abs*Male gender              | -9.36 (-18.13, -0.60) | Female                          | 192 | 4.98 (0.20, 9.76)*    |
|                                                |                       | Male                            | 497 | 1.05 (-1.24, 3.33)    |
| PM <sub>2.5</sub> abs*Hypertension             | 0.06 (-0.21, 0.34)    | Hypertension, No                | 484 | 1.80 (-0.48, 4.08)    |
|                                                |                       | Hypertension, Yes               | 205 | 4.18 (-0.54, 8.89)    |
| PM <sub>2.5</sub> abs*BMI                      | -0.44 (-1.69, 0.81)   | BMI<27                          | 531 | 2.54 (0.18, 4.89)*    |
|                                                |                       | BMI≥27                          | 158 | 2.08 (-2.35, 6.52)    |
| PM <sub>2.5</sub> abs*Diabetes mellitus        | 2.03 (-6.36, 10.42)   | Diabetes mellitus, No           | 452 | 1.86 (-0.20, 3.93)    |
|                                                |                       | Diabetes mellitus, Yes          | 237 | 3.23 (-1.52, 7.98)    |
| PM <sub>2.5</sub> abs*Ever smoking             | -5.48 (-14.61, 3.64)  | Ever Smoking, No                | 523 | 2.85 (0.38, 5.32)*    |
|                                                |                       | Ever Smoking, Yes               | 166 | 0.08 (-3.73, 3.90)    |
| PM <sub>2.5</sub> abs*Lipid-lowering treatment | -1.12 (-4.03, 1.79)   | Lipid-lowering treatment, No    | 625 | 1.85 (-0.36, 4.07)    |
|                                                |                       | Lipid-lowering treatment, Yes   | 64  | 3.53 (-2.60, 9.66)    |
| PM <sub>2.5</sub> abs*Hypercholesterolemia     | 7.27 (-6.22, 20.75)   | Hypercholesterolemia, No        | 388 | 3.28 (0.52, 6.03)*    |
|                                                |                       | Hypercholesterolemia, Yes       | 301 | 1.32 (-1.85, 4.48)    |

<sup>a</sup>Multivariate linear regression analysis are with interaction term. <sup>b</sup>Multivariate linear regression analysis are conducted in subgroup. Both model are adjusted for age, male gender, body mass index, systolic blood pressure, LDL-cholesterol, lipid-lowering treatment, diabetes mellitus, education, and ever smoking history. Exposure increment used for calculation of percent change PM<sub>2.5</sub>abs in every 10<sup>-5</sup> m<sup>-1</sup>.

\*P < 0.05.

**Table S4.** Interaction effects and the subgroups analysis to maximum CIMT at LCCA with NO<sub>2</sub>.

| Interaction Effect <sup>a</sup>           |                       | Subgroups Analysis <sup>b</sup> |     |                       |
|-------------------------------------------|-----------------------|---------------------------------|-----|-----------------------|
| Interaction Term                          | % difference (95% CI) | Subgroup                        | N   | % difference (95% CI) |
| NO <sub>2</sub> *Age                      | 0.40 (0.08, 0.72)*    | Age<50 years                    | 371 | 0.04 (-1.35, 1.43)    |
|                                           |                       | Age≥50 years                    | 318 | 3.13 (0.45, 5.80)*    |
| NO <sub>2</sub> *Male gender              | -4.95 (-10.53, 0.63)  | Female                          | 192 | 2.90 (0.04, 5.77)*    |
|                                           |                       | Male                            | 497 | 0.69 (-0.79, 2.18)    |
| NO <sub>2</sub> *Hypertension             | 0.01 (-0.18, 0.19)    | Hypertension, No                | 484 | 1.83 (0.38, 3.29)*    |
|                                           |                       | Hypertension, Yes               | 205 | 0.92 (-2.08, 3.91)    |
| NO <sub>2</sub> *BMI                      | -0.35 (-1.17, 0.48)   | BMI<27                          | 531 | 1.62 (0.11, 3.12)*    |
|                                           |                       | BMI≥27                          | 158 | 1.16 (-1.73, 4.06)    |
| NO <sub>2</sub> *Diabetes mellitus        | -0.51 (-5.86, 4.85)   | Diabetes mellitus, No           | 452 | 1.73 (0.40, 3.07)*    |
|                                           |                       | Diabetes mellitus, Yes          | 237 | 1.03 (-1.98, 4.04)    |
| NO <sub>2</sub> *Ever smoking             | -1.81 (-7.46, 3.83)   | Ever Smoking, No                | 523 | 1.75 (0.15, 3.34)*    |
|                                           |                       | Ever Smoking, Yes               | 166 | 0.80 (-1.52, 3.11)    |
| NO <sub>2</sub> *Lipid-lowering treatment | -1.59 (-3.29, 0.11)   | Lipid-lowering treatment, No    | 625 | 1.64 (0.23, 3.06)*    |
|                                           |                       | Lipid-lowering treatment, Yes   | 64  | -0.14 (-3.91, 3.62)   |
| NO <sub>2</sub> *Hypercholesterolemia     | -2.70 (-11.16, 5.76)  | Hypercholesterolemia, No        | 388 | 1.80 (0.08, 3.52)*    |
|                                           |                       | Hypercholesterolemia, Yes       | 301 | 0.97 (-1.11, 3.06)    |

<sup>a</sup>Multivariate linear regression analysis are with interaction term. <sup>b</sup>Multivariate linear regression analysis are conducted in subgroup.

Adjusted for age, male gender, body mass index, systolic blood pressure, LDL-cholesterol, lipid-lowering treatment, diabetes mellitus, education, and ever smoking history. Exposure increment used for calculation of percent change NO<sub>2</sub> in every 20 µg/m<sup>3</sup>.

\*P < 0.05.
